# Supplementary material for: Low overpotential water oxidation to hydrogen peroxide on a MnOx catalyst
Source: Royal Society of Chemistry journal article supplement (doi:10.1039/c2ee21832a), 2012-01-01

**Supporting Information for:**

**Low overpotential water oxidation to hydrogen peroxide on  
manganese dioxide catalysts**

Alex Izgorodin, Ekaterina Izgorodina and Douglas R. MacFarlane

ARC Centre for Electromaterials Science

School of Chemistry Monash University

Clayton, Victoria 3800

Australia

## Titration of hydrogen peroxide in BAS-IL ionic liquid

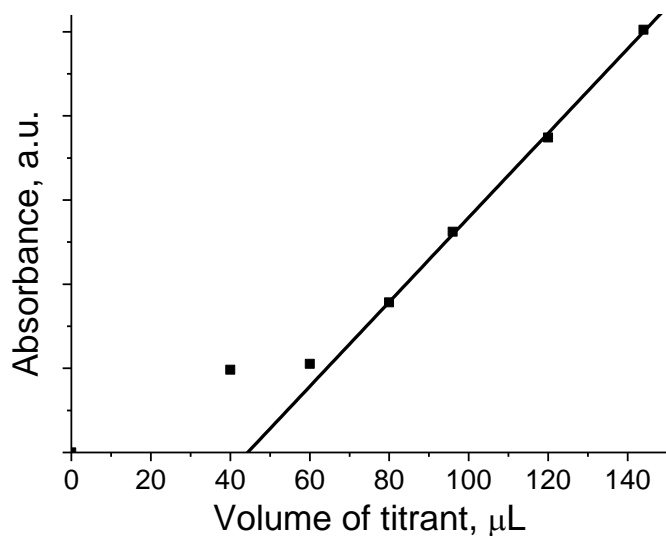

**Figure 1.** Absorbance of  $\text{MnO}_4^-$  at 565 nm added to the BAS-IL electrolyte after electrolysis (200mC) to form hydrogen peroxide.

## Stability of Electrolyte to oxidation

Stability of the electrolyte was tested using standard hydrogen peroxide as a strong oxidizing agent. In a typical procedure  $10^{-3}$  moles of hydrogen peroxide was added to the 1 ml of as prepared BAS electrolyte at pH10. After about an hour hydrogen peroxide in the electrolyte was slowly disproportionated using  $\text{MnO}_2$  powder as catalyst. Nuclear magnetic resonance (NMR) spectroscopy analysis and mass spectroscopic analysis of the electrolyte before and after treatment with hydrogen peroxide is shown below.

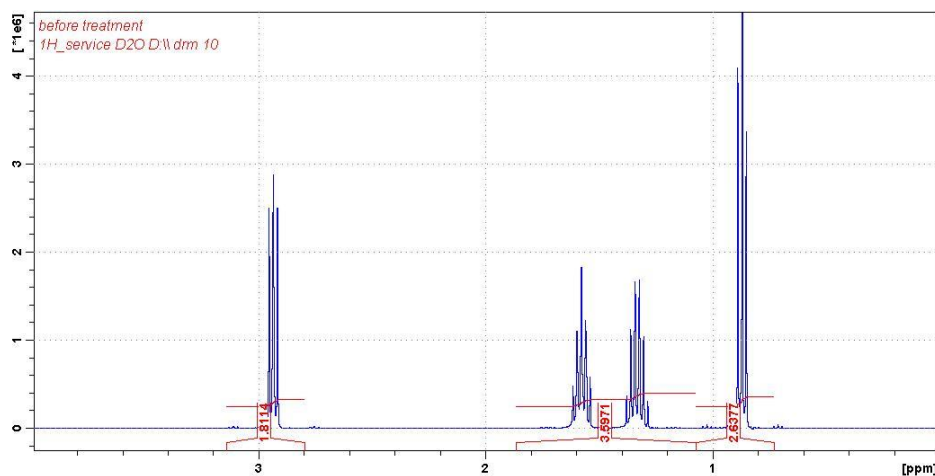

**Figure 2.** NMR spectrum of the as prepared BAS electrolyte at pH10.

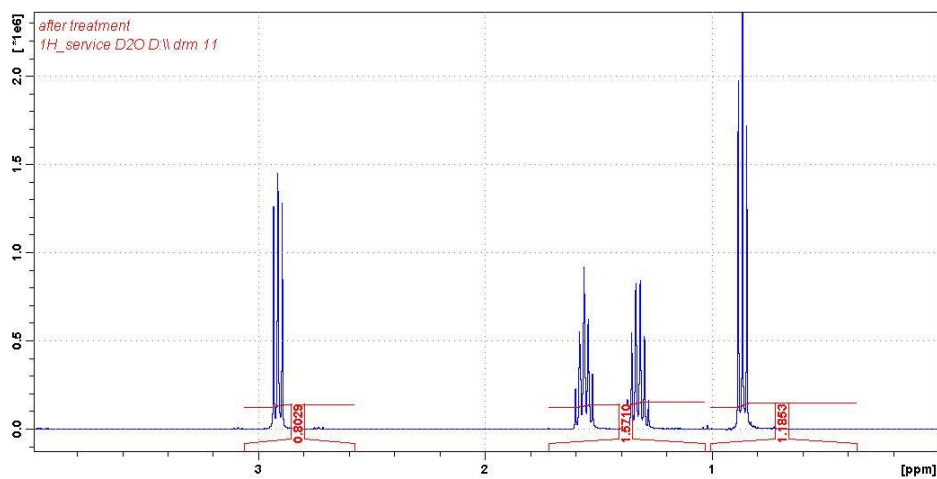

**Figure 3.** NMR spectrum of the BAS electrolyte at pH10 after treatment with hydrogen peroxide.

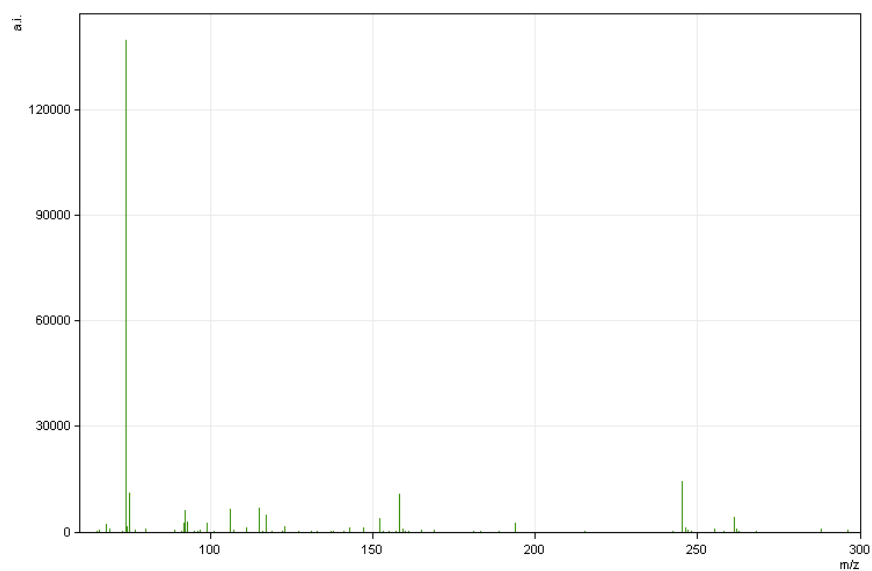

**Figure 4.** Mass spectrum of the as prepared BAS electrolyte at pH10.

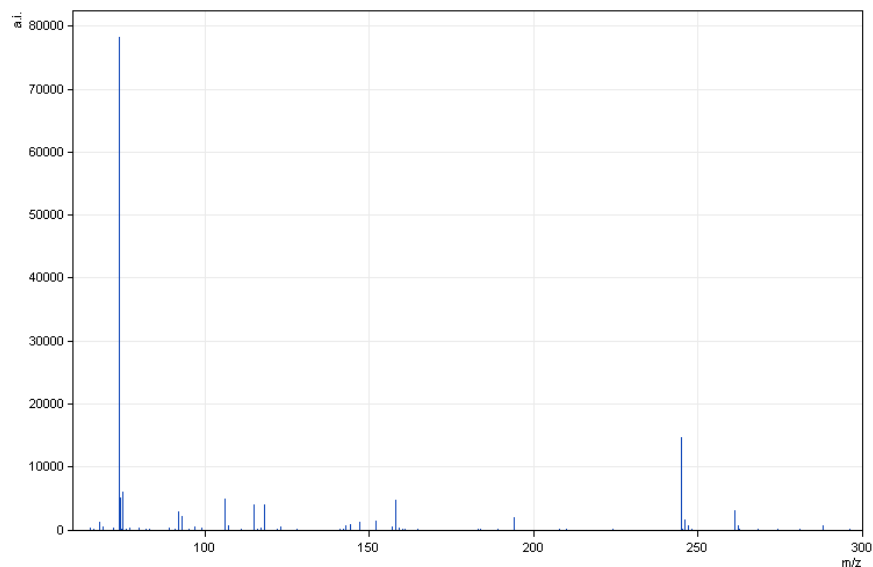

**Figure 5.** Mass spectrum of the BAS electrolyte at pH10 after treatment with hydrogen peroxide.

Stability of the electrolyte was also tested after prolong electrochemical experiments. In a typical procedure oxidation equivalent to a charge of 1.8 C was passed per 1 ml of as prepared BAS electrolyte at pH10. Then hydrogen peroxide in the electrolyte was slowly disproportionated using  $\text{MnO}_2$  powder as catalyst. Nuclear magnetic resonance (NMR) spectroscopy analysis and mass spectroscopic analysis of the electrolyte before and after treatment with hydrogen peroxide is shown below.

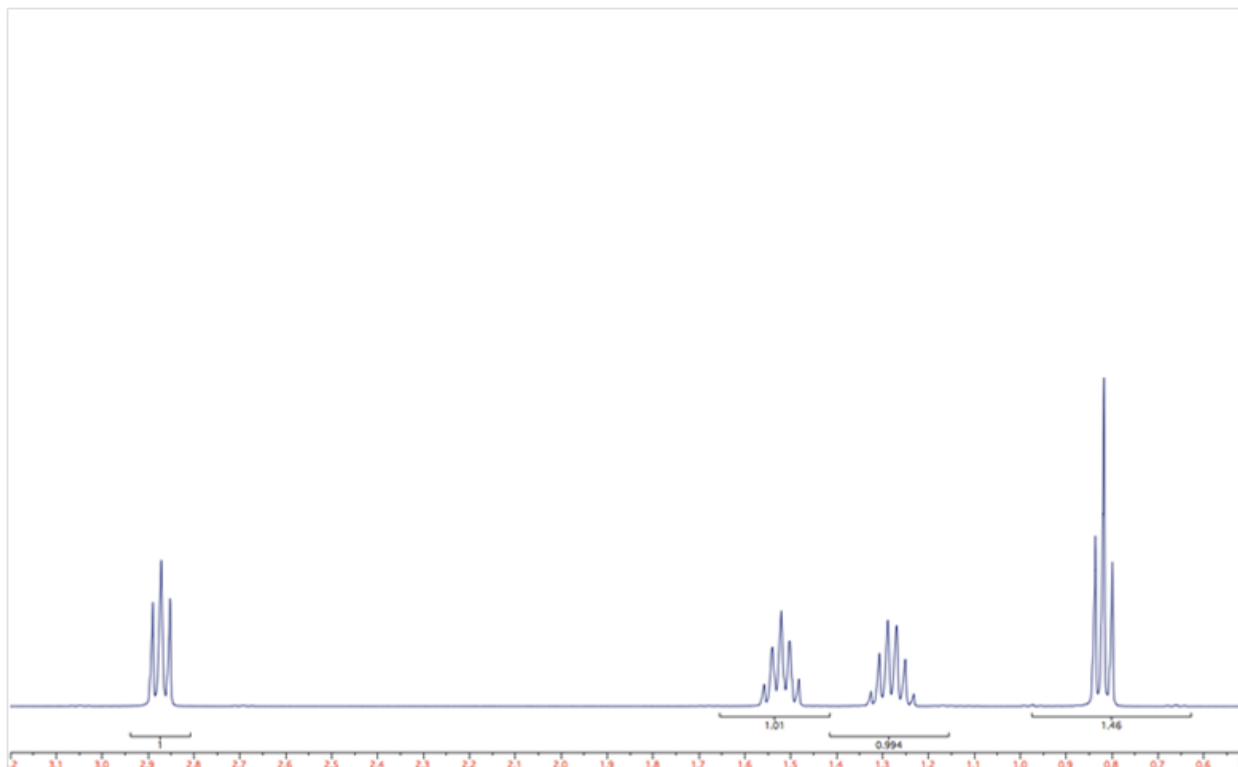

**Figure 6.** NMR spectrum of the as prepared BAS electrolyte at pH10.

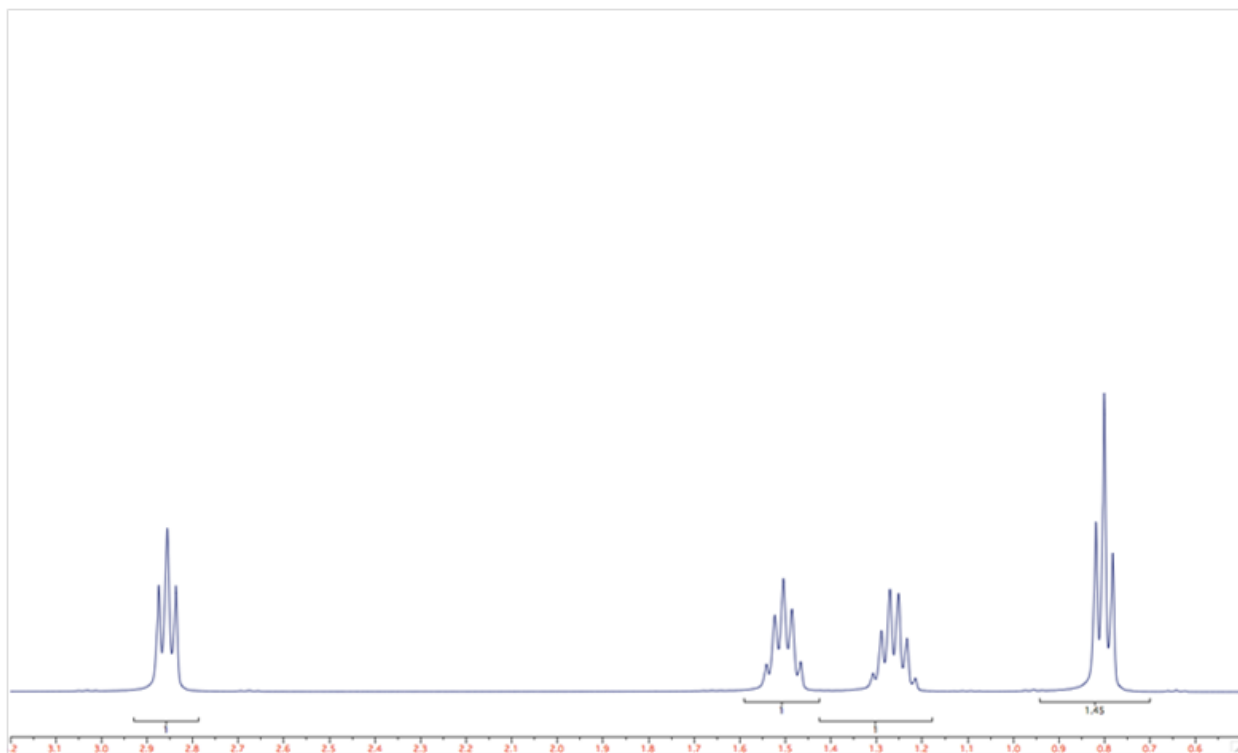

**Figure 7.** NMR spectrum of the BAS electrolyte at pH10 after electrochemical oxidation.

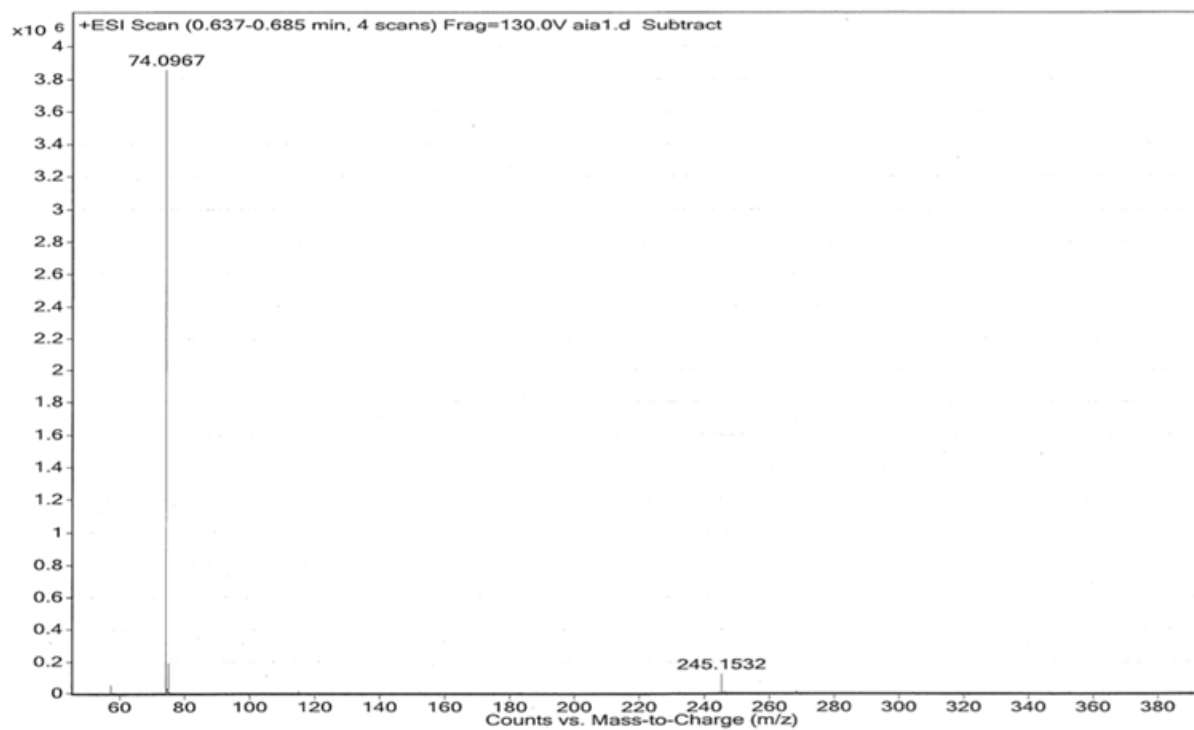

**Figure 8.** Mass spectrum of the as prepared BAS electrolyte at pH10.

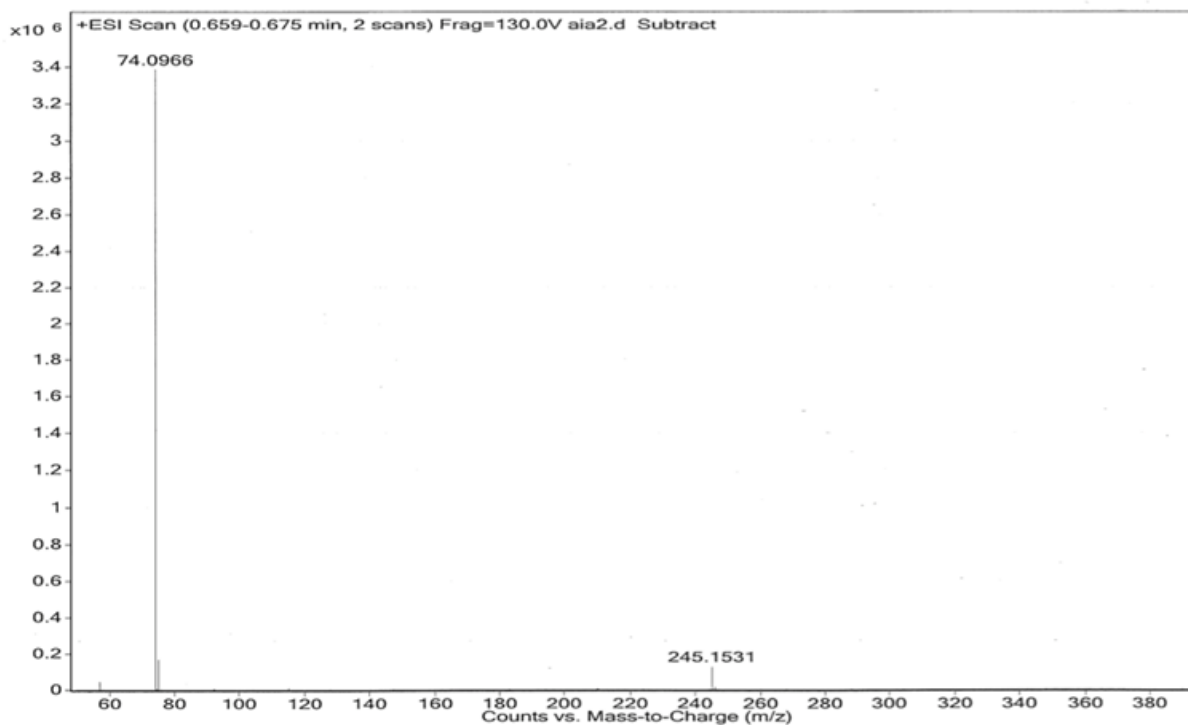

**Figure 9.** Mass spectrum of the BAS electrolyte at pH10 after treatment with hydrogen peroxide.

## Oxygen Generation

The amount of oxygen generated during oxidation using  $\text{KMnO}_4$  was recorded using a custom built, gas-tight cell with a total volume of 7 ml and filled with 5 ml of electrolyte used for titration, leaving 2 ml of head space volume. A fluorescent sensor probe placed in the head space was used to detect the oxygen concentration. The response from the  $\text{O}_2$  sensor, recorded at 1 s intervals, was converted into the partial pressure of  $\text{O}_2$  in the headspace using a two-point calibration curve (air, 20.9%  $\text{O}_2$ ; and high purity  $\text{N}_2$ , 0%  $\text{O}_2$ ). The amount of oxygen in the head space was calculated by converting the measured partial pressure of  $\text{O}_2$  into  $\mu\text{mols}$ , on the basis of a head space volume of 2 mL. Figure 10 shows response from the oxygen sensor during standard titration, that is equivalent to an  $8.66 \times 10^{-7}$   $\mu\text{moles}$  of oxygen. Theoretical oxygen in this experiment was  $1.4 \times 10^{-6}$   $\mu\text{moles}$ . Thus the detected amount of oxygen is about 62% of theoretical. The lower than theoretical is expected given that the  $\text{H}_2\text{O}_2$  in this electrolyte undergoes constant disproportionation.

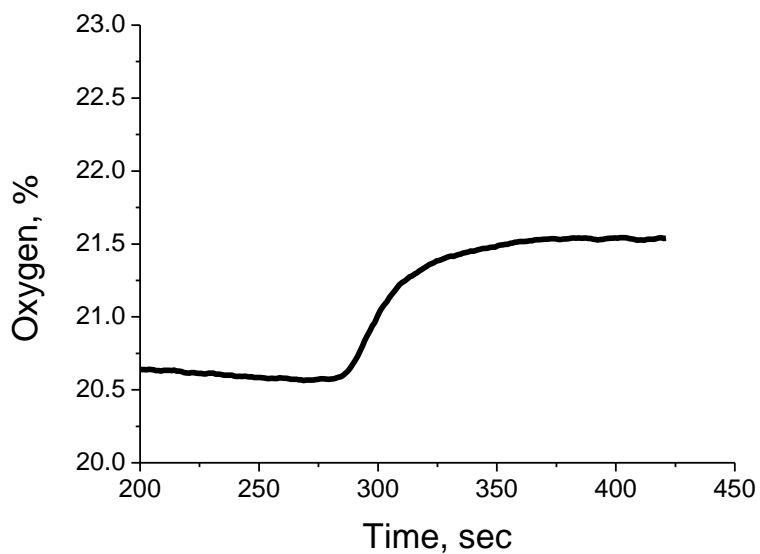

Supplement: c2ee21832a.pdf [file c2ee21832a.pdf]
